# Supplementary material
Source: publisher figshare collection journal article supplement (https://gsapubs.figshare.com/articles/dataset/_/12347246)
Supplement: Supplementary file 1 [file 2]

Reich, et al., 2006, Thermal behavior of metal nanoparticles in geologic materials: *Geology*, v. 34, p. 1033–1036, <https://doi.org/10.1130/G22829A.1>

## MOVIE CAPTIONS

### Movie 1

HAADF-STEM movie of in-situ heating of a Au nanoparticles ( $0.2\ \mu\text{m}^2$  area) between 25–550°C. Au nanoparticles (bright spots on the darker Fe(S,As)<sub>2</sub> matrix) remained unchanged until ~370°C. Above this temperature, larger particles (>8 nm) grow at the expense of the smaller ones (<4 nm). Total duration of the experiment was ~45 minutes. Movie duration is 55 seconds. Temperature (in °Celsius) is shown on the upper right corner. See movie file 2006225\_Movie1.avi (2.4MB)

### Movie 2

Real time HRTEM movie of in-situ heating of a faceted single Au nanoparticle recorded during ~20 seconds at ~450°C. The Au particle decreases in size and crystal facets become more irregular. Lattice fringes can be observed, and a dark contrast halo develops around the particle. Scale bar is 5 nm. See movie file 2006225\_Movie2.avi (8.4 MB)

### Movie 3

Real time HRTEM movie (7 seconds) of in-situ heating of the same nanoparticle in Movie 2, now at ~480°C. The Au particle continues to shrink, and its edges are no longer aligned parallel to specific crystallographic directions. Lattice fringes are still observed, and the dark contrast halo engulfs the particle. Scale bar is 5 nm. See movie file 2006225\_Movie3.avi (3.2 MB)

### Movie 4

Real time HRTEM movie (10 seconds) of in-situ heating of the same nanoparticle in Movies 2 and 3, now at 550°C. The movie captures the exact moment when the Au nanoparticle shrinks significantly and dissolves completely into the host matrix. The dark halo remains around where the particle was. Scale bar is 5 nm. See movie file 2006225\_Movie4.avi (4.6 MB)

### Movie 5

Real time HRTEM movie of the last 37 seconds of in-situ heating of two Au nanoparticles in the same frame, at 650°C. The smaller particle dissolves into the arsenian pyrite host in the presence of the larger particle. Scale bar is 50 nm. See movie file 2006225\_Movie5.avi (16.1 MB)
